# Supplementary material for: Preparation of novel anionic polymeric ionic liquid materials and their potential application to protein adsorption
Source: Royal Society of Chemistry journal article supplement (doi:10.1039/c7tb01234a), 2017-01-01
Supplement: c7tb01234a1.pdf [file c7tb01234a1.pdf]

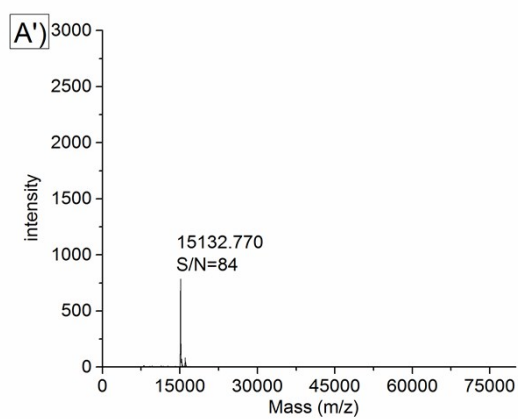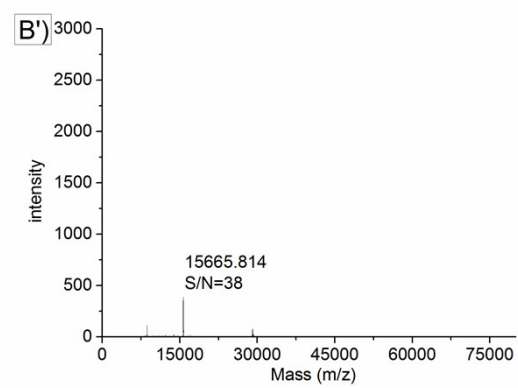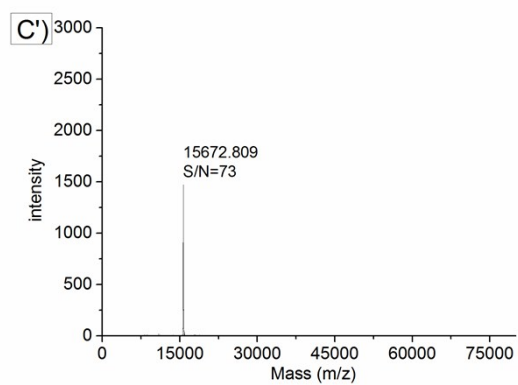

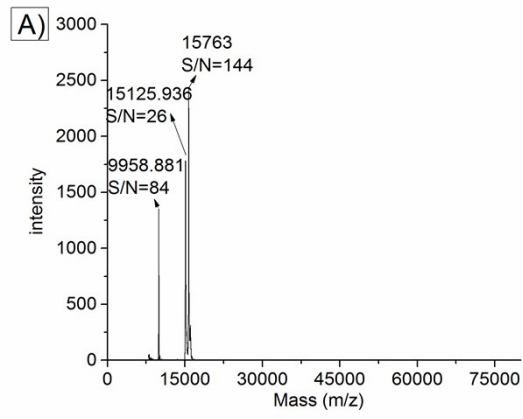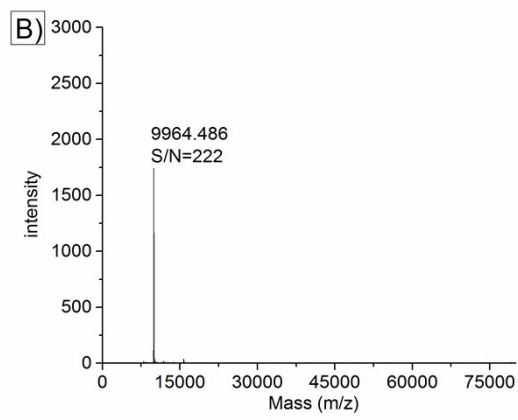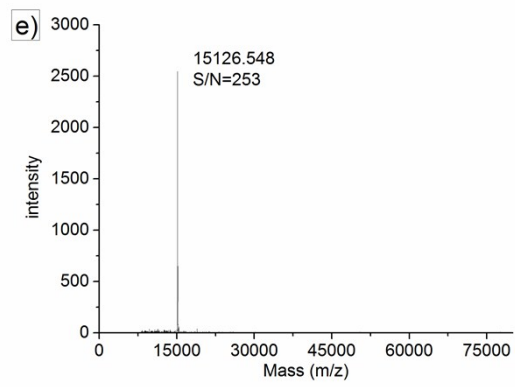

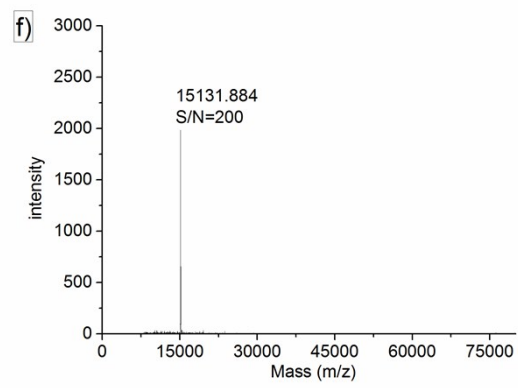

**Fig. S1** MALDI-TOF spectra of BHb; A' standard of BHb; B' standard of CA; C' standard of SOD; A the bovine blood before adsorption; B the bovine blood after adsorption; e, f were eluents of e, f respectively.
